# Supplementary material
Source: MDPI journal article supplement (https://www.mdpi.com/2073-8994/13/8/1462)
Supplement: s1 [file s1]

# Evaluation of (Z)-5-(Azulen-1-Ylmethylene)-2-Thioxothiazolidin-4-Ones Properties Using Quantum Mechanical Calculations

Alina-Alexandra Vasile (Corbei) <sup>1</sup>, Eleonora-Mihaela Ungureanu <sup>2,\*</sup>, Gabriela Stanciu <sup>3</sup>, Mihaela Cristea <sup>4</sup> and Amalia Stefaniu <sup>5,\*</sup>

<sup>1</sup> Department of Inorganic Chemistry, Physical Chemistry and Electrochemistry, University "Politehnica" of Bucharest, 011061 Bucharest, Romania; vasilecalinaalexandra@yahoo.com

<sup>2</sup> Faculty of Applied Chemistry and Materials Science, University "Politehnica" of Bucharest, Gheorghe Polizu 1-7, Sector 1, 011061 Bucharest, Romania

<sup>3</sup> Department of Chemistry and Chemical Engineering, "Ovidius" University Constanta, 900527 Constanta, Romania; gstanciu@univ-ovidius.ro

<sup>4</sup> Institute of Organic Chemistry "C. D. Nenitzescu" of the Romanian Academy, 71141 Bucharest, Romania; mihaela.cristea@ccocdn.ro

<sup>5</sup> National Institute of Chemical—Pharmaceutical Research and Development—Bucharest, 031299 Bucharest, Romania

\* Correspondence: em\_ungureanu2000@yahoo.com (E.-M.U.); astefaniu@gmail.com (A.S.)

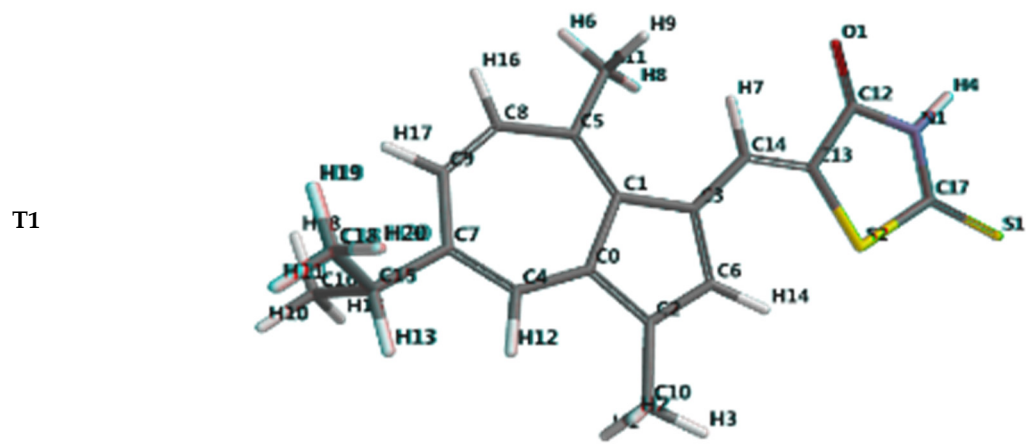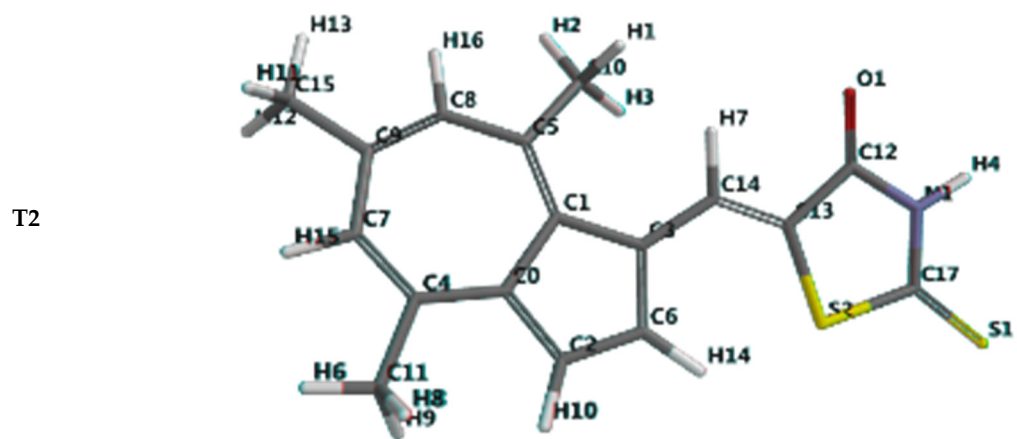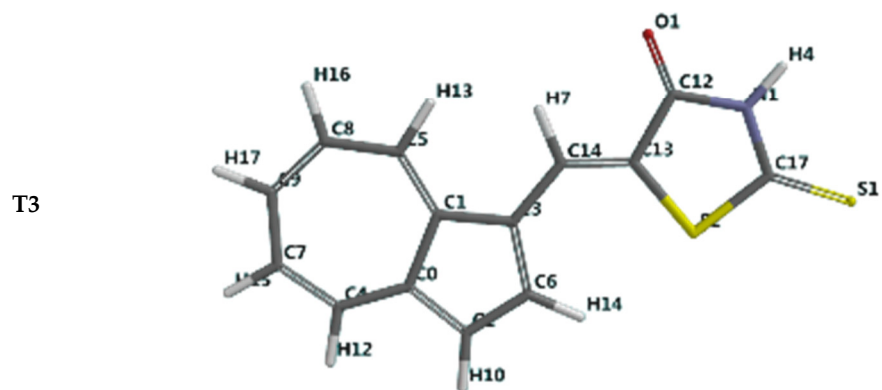

**Figure S1.** Atomic numbering scheme for the optimized geometries of T1-T3.

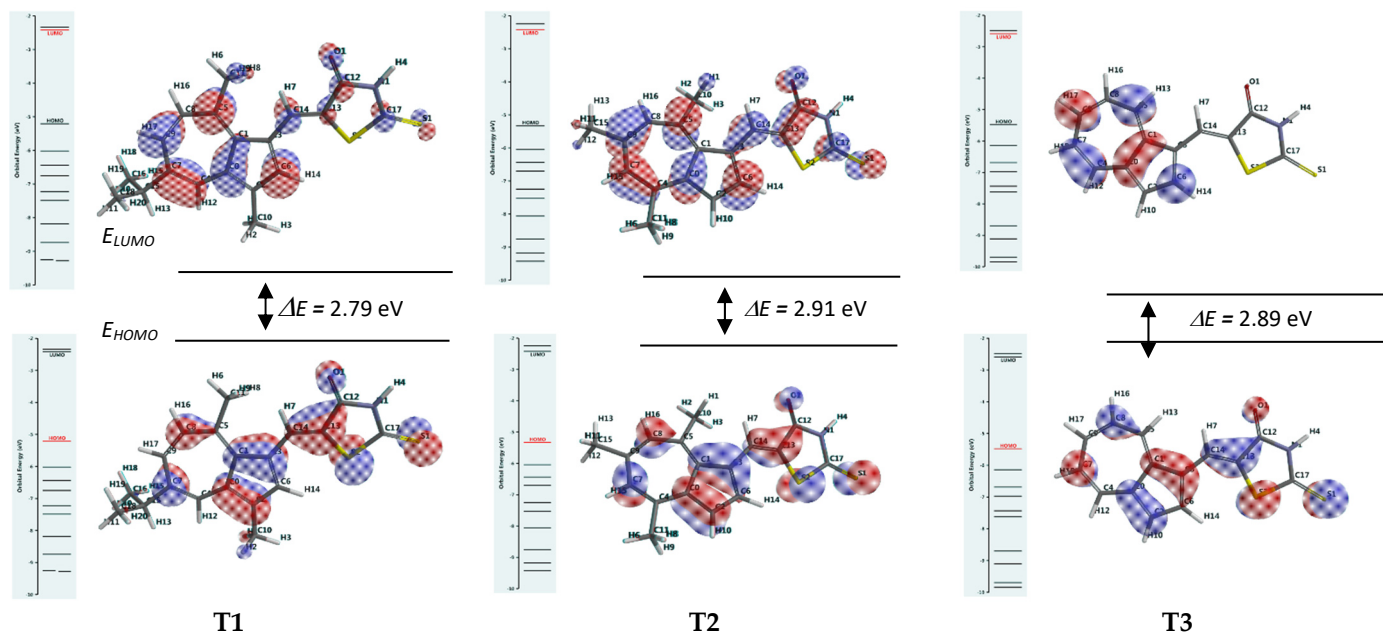

**Figure S2.** HOMO (down) and LUMO (up) frontier molecular orbitals and their energy gaps for T1 - T3 calculated using B3LYP/6-31+G (d,p).

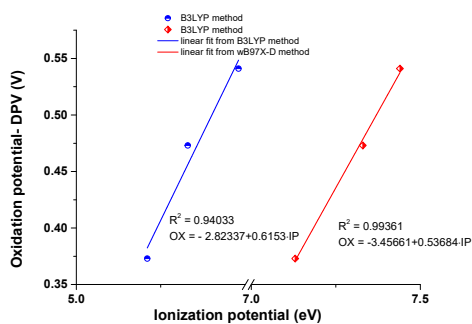

**Figure S3.** Correlation between ionization potentials calculated using B3LYP/6-31G (d,p) (blue line) or wB97X-D/6-311++G (d,p) (red line) density functional models and experimental oxidation potentials.

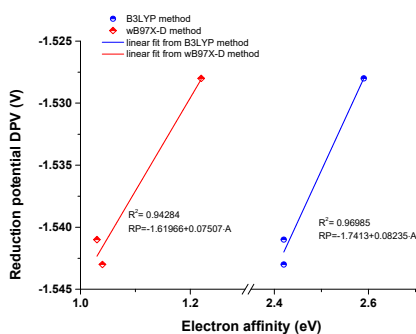

**Figure S4.** Correlation between electron affinity calculated using B3LYP/6-31G (d,p) (blue line) or wB97X-D/6-311++G (d,p) (red line) density functional models and experimental reduction potentials.

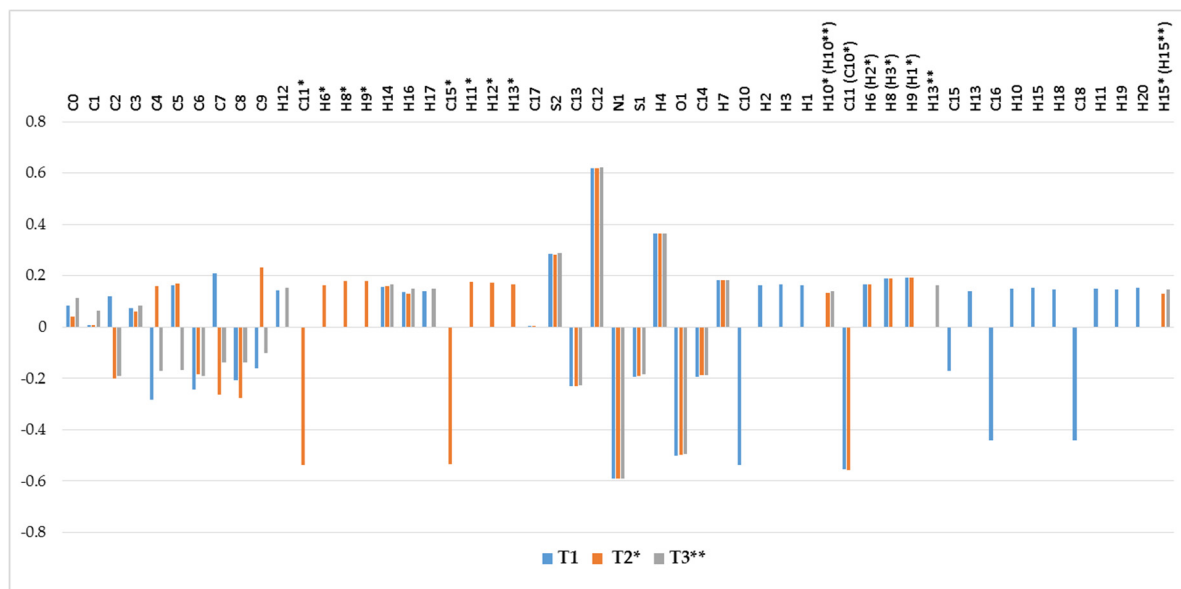

**Figure S5.** Mulliken population diagram for **T1-T3** (using B3LYP/6-31G(d) functional).

**Table S1.** Atom labelling and predicted bond lengths ( $\text{\AA}$ ) for **T1 - T3** compounds (using B3LYP/6-31G(d) functional).

|                                                       | <b>T1</b> | <b>T2</b>     | <b>T3</b> |
|-------------------------------------------------------|-----------|---------------|-----------|
| <i>Cycle of 7 atoms (I)</i>                           |           |               |           |
| C5-C1                                                 | 1.409     | 1.407         | 1.390     |
| C5-C8                                                 | 1.411     | 1.411         | 1.400     |
| C8-C9                                                 | 1.393     | 1.394         | 1.396     |
| C9-C7                                                 | 1.398     | 1.403         | 1.398     |
| C7-C4                                                 | 1.399     | 1.393         | 1.396     |
| C4-C0                                                 | 1.392     | 1.412         | 1.393     |
| C0-C1                                                 | 1.493     | 1.492         | 1.484     |
| <i>Substituents (methyl and isopropyl) of cycle I</i> |           |               |           |
| C5-C11: 1.519                                         |           | C5-C10: 1.520 | -         |
| C7-C15: 1.530                                         |           | C9-C15: 1.518 | -         |
| C15-C18: 1.541                                        |           | C4-C11: 1.518 | -         |
| C15-C16: 1.541                                        |           | -             | -         |
| <i>Cycle of 5 atoms (II)</i>                          |           |               |           |
| C1-C3                                                 | 1.438     | 1.446         | 1.433     |
| C3-C6                                                 | 1.428     | 1.419         | 1.425     |
| C6-C2                                                 | 1.381     | 1.385         | 1.388     |
| C2-C0                                                 | 1.426     | 1.411         | 1.413     |
| <i>Substituents of cycle II</i>                       |           |               |           |
| C2-C10: 1.502                                         |           | -             | -         |
| <i>Chain between cycle II and cycle III</i>           |           |               |           |
| C3-C14                                                | 1.431     | 1.435         | 1.428     |
| C14-C13                                               | 1.364     | 1.362         | 1.361     |
| <i>Cycle III</i>                                      |           |               |           |
| C13-S2                                                | 1.777     | 1.777         | 1.775     |
| S2-C17                                                | 1.777     | 1.777         | 1.778     |
| C17-N1                                                | 1.366     | 1.366         | 1.366     |
| N1-C12                                                | 1.406     | 1.405         | 1.405     |
| C12-C13                                               | 1.475     | 1.476         | 1.476     |
| <i>Functional groups (C=O and C=S) of cycle III</i>   |           |               |           |
| C12-O1                                                | 1.220     | 1.220         | 1.219     |
| C17-S1                                                | 1.648     | 1.647         | 1.646     |

**Table S2.** Angles and dihedral angles (°) prediction for **T1 - T3** optimized conformers (using B3LYP/6-31G(d) functional).

| <b>T1</b>                           | <b>T2</b>                          | <b>T3</b>                           |
|-------------------------------------|------------------------------------|-------------------------------------|
| Dihedral (C11, C5, C1, C3): 1.95    | Dihedral (C10, C5, C1, C3): 2.81   | Dihedral (H13, C5, C1, C3): -0.06   |
| Dihedral (H7, C14, C3, C1): 10.08   | Dihedral (H7, C14, C3, C1): 16.73  | Dihedral (H7, C14, C3, C1): 0.11    |
| Dihedral (H7, C14, C13, C12): -0.10 | Dihedral (H7, C14, C13, C12): 0.10 | Dihedral (H7, C14, C13, C12): -0.11 |
| Dihedral (O1, C12, C13, C14): 1.33  | Dihedral (O1, C12, C13, C14): 2.11 | Dihedral (O1, C12, C13, C14): 0.20  |
| Dihedral (O1, C12, N1, H4): 0.21    | Dihedral (O1, C12, N1, H4): 0.05   | Dihedral (O1, C12, N1, H4): 0.01    |
| Dihedral (H4, N1, C17, S1): 0.06    | Dihedral (C6, C3, C14, C13): 19.84 | Dihedral (H4, N1, C17, S1): -0.01   |
| Dihedral (C6, C3, C14, C13): 12.27  | Dihedral (H14, C6, C3, C14): -1.71 | Dihedral (C6, C3, C14, C13): 0.09   |
| Dihedral (H14, C6, C3, C14): -1.67  | Dihedral (S1, C17, N1, H4): 0.22   | Dihedral (H14, C6, C3, C14): 0.09   |
| Dihedral (C3, C14, C13, S2): 3.56   | Dihedral (C11, C4, C0, C2): -0.37  | Dihedral (C3, C14, C13, S2): -0.04  |
| Dihedral (C10, C2, C6, H14): -1.37  | Dihedral (C11, C4, C7, H15): 0.92  | Dihedral (S1, C17, N1, H4): -0.01   |
| Dihedral (C10, C2, C0, C4): 0.88    | Dihedral (C15, C9, C8, H16): -1.99 | Angle (S2, C17, S1): 124.84         |
| Dihedral (C11, C5, C1, C3): 1.95    | Dihedral (C15, C9, C7, H15): 0.73  | Angle (C14, C13, S2): 129.50        |
| Dihedral (C11, C5, C8, H16): -1.11  | Dihedral (C10, C5, C8, H16): -1.97 | Angle (H4, N1, C17): 120.09         |
| Dihedral (C15, C7, C9, H17): -0.48  | Dihedral (C10, C5, C1, C3): 2.81   | Angle (H4, N1, C12): 120.13         |
| Dihedral (C15, C7, C4, H12): 1.21   | Angle (O1, C12, N1): 123.16        | Angle (O1, C12, N1): 123.26         |
| Angle (O1, C12, N1): 123.06         | Angle (O1, C12, C13): 127.92       | Angle (O1, C12, C13): 127.88        |
| Angle (O1, C12, C13): 127.97        | Angle (C10, C5, C1): 120.68        | Angle (H13, C5, C1): 116.10         |
| Angle (C11, C5, C1): 120.65         | Angle (C10, C5, C8): 113.08        | Angle (H13, C5, C8): 114.65         |
| Angle (C11, C5, C8): 113.55         | Angle (H7, C14, C3): 118.79        | Angle (H7, C14, C3): 117.25         |
| Angle (H7, C14, C3): 118.46         | Angle (H7, C14, C13): 111.30       | Angle (H7, C14, C13): 119.97        |
| Angle (H7, C14, C13): 110.83        | Angle (C12, C13, C14): 119.95      | Angle (C12, C13, C14): 120.33       |
| Angle (C12, C13, C14): 119.49       | Angle (C11, C4, C0): 117.20        | Angle (H12, C4, C0): 115.10         |
| Angle (H12, C4, C0): 113.97         | Angle (C11, C4, C7): 116.07        | Angle (H12, C4, C7): 115.75         |
| Angle (H12, C4, C7): 114.75         | Angle (C0, C2, H10): 125.70        | Angle (C0, C2, H10): 124.94         |
| Angle (C0, C2, C10): 126.60         | Angle (H15, C7, C9): 114.58        | Angle (H15, C7, C9): 115.85         |
| Angle (C15, C7, C9): 118.48         | Angle (H15, C7, C4): 115.15        | Angle (H15, C7, C4): 115.77         |
| Angle (C15, C7, C4): 118.00         | Angle (C15, C9, C8): 117.27        | Angle (H17, C9, C8): 115.28         |
| Angle (H17, C9, C8): 113.69         | Angle (C15, C9, C7): 115.59        | Angle (H17, C9, C7): 115.33         |
| Angle (C7, C9, H17): 115.41         | Angle (C9, C8, H16): 113.64        | Angle (C9, C8, H16): 115.64         |
| Angle (C9, C8, H16): 113.19         | Angle (H16, C8, C5): 113.55        | Angle (H16, C8, C5): 115.32         |
| Angle (H16, C8, C5): 113.71         | Angle (C8, C5, C10): 113.07        | Angle (H10, C2, C6): 126.13         |
| Angle (C8, C5, C11): 113.55         | Angle (H10, C2, C6): 125.10        | Angle (H10, C2, C0): 124.94         |
| Angle (C11, C5, C1): 120.95         | Angle (H10, C2, C0): 125.70        | Angle (C2, C6, H14): 124.37         |
| Angle (C10, C2, C6): 125.84         | Angle (C2, C6, H14): 124.47        | Angle (H14, C6, C3): 125.23         |
| Angle (C2, C6, H14): 123.61         | Angle (H14, C6, C3): 124.90        | Angle (C3, C14, C13): 130.77        |
| Angle (H14, C6, C3): 124.70         | Angle (C3, C14, C13): 129.88       |                                     |
| Angle (C3, C14, C13): 130.68        |                                    |                                     |

**Table S3.** Mulliken charges for **T1-T3** (using B3LYP/6-31G(d) functional).

| Atom labelling | <b>T1</b>     | <b>T2*</b>    | <b>T3**</b>   |
|----------------|---------------|---------------|---------------|
| C0             | +0.083        | +0.041        | +0.113        |
| C1             | +0.006        | +0.009        | +0.063        |
| <b>C2</b>      | <b>+0.119</b> | <b>-0.201</b> | <b>-0.190</b> |
| C3             | +0.072        | +0.060        | +0.083        |
| <b>C4</b>      | <b>-0.282</b> | <b>+0.158</b> | <b>-0.171</b> |
| <b>C5</b>      | <b>+0.161</b> | <b>+0.168</b> | <b>-0.169</b> |
| C6             | -0.242        | -0.183        | -0.192        |
| <b>C7</b>      | <b>+0.208</b> | <b>-0.264</b> | <b>-0.137</b> |
| C8             | -0.207        | -0.277        | -0.138        |
| <b>C9</b>      | <b>-0.161</b> | <b>+0.233</b> | <b>-0.102</b> |
| H12            | +0.142        | -             | +0.152        |
| C11*           | -             | -0.538        | -             |
| H6*            | -             | +0.163        | -             |
| H8*            | -             | +0.178        | -             |
| H9*            | -             | +0.178        | -             |
| H14            | +0.157        | +0.160        | +0.166        |
| H16            | +0.135        | +0.129        | +0.149        |
| H17            | +0.141        | -             | +0.151        |
| C15*           | -             | -0.535        | -             |
| H11*           | -             | +0.175        | -             |
| H12*           | -             | +0.174        | -             |
| H13*           | -             | +0.166        | -             |
| C17            | +0.001        | +0.004        | -0.000        |
| <b>S2</b>      | <b>+0.284</b> | <b>+0.283</b> | <b>+0.289</b> |
| C13            | -0.231        | -0.230        | -0.227        |
| C12            | +0.619        | +0.619        | +0.621        |
| N1             | -0.591        | -0.591        | -0.591        |
| <b>S1</b>      | <b>-0.193</b> | <b>-0.190</b> | <b>-0.183</b> |
| H4             | +0.363        | +0.363        | +0.364        |
| <b>O1</b>      | <b>-0.501</b> | <b>-0.498</b> | <b>-0.494</b> |
| C14            | -0.195        | -0.188        | -0.187        |
| H7             | +0.181        | +0.183        | +0.181        |
| C10            | -0.539        | -             | -             |
| H2             | +0.162        | -             | -             |
| H3             | +0.167        | -             | -             |
| H1             | +0.162        | -             | -             |
| H10* (H10**)   | -             | +0.133        | +0.140        |
| C11 (C10*)     | -0.554        | -0.556        | 0             |
| H6 (H2*)       | +0.165        | +0.166        | 0             |
| H8 (H3*)       | +0.189        | +0.190        | 0             |
| H9 (H1*)       | +0.193        | +0.191        | 0             |
| H13**          | -             | -             | +0.163        |
| C15            | -0.170        | -             | -             |
| H13            | +0.139        | -             | -             |
| C16            | -0.441        | -             | -             |
| H10            | +0.150        | -             | -             |
| H15            | +0.154        | -             | -             |
| H18            | +0.146        | -             | -             |
| C18            | -0.442        | -             | -             |
| H11            | +0.150        | -             | -             |
| H19            | +0.146        | -             | -             |
| H20            | +0.154        | -             | -             |
| H15* (H15**)   | -             | +0.129        | +0.147        |
